# Supplementary material for: Crystallization behaviour of poly(ethylene oxide) under confinement in the electrospun nanofibers of polystyrene/poly(ethylene oxide) blends
Source: Royal Society of Chemistry journal article supplement (doi:10.1039/c6sm00648e), 2016-01-01
Supplement: c6sm00648e1.pdf [file c6sm00648e1.pdf]

## **Supplementary Information**

### **Crystallization Behaviour of Poly (ethylene oxide) Under Confinement in Electrospun Nanofibers of Polystyrene/Poly(ethylene oxide) Blends**

*Pratick Samanta,<sup>a</sup> Thangapandian V,<sup>a</sup> Sajan Singh,<sup>a</sup> Rajiv Srivastava,<sup>a</sup> Bhanu Nandan,<sup>\*a</sup> Chien-Liang Liu<sup>b</sup>, Hsin-Lung Chen,<sup>b\*</sup>*

*<sup>a</sup> Department of Textile Technology, Indian Institute of Technology Delhi, Hauz Khas, New Delhi 110016 (India). E-mail: [nandan@textile.iitd.ac.in](mailto:nandan@textile.iitd.ac.in)*

*<sup>b</sup> Department of Chemical Engineering, National Tsing-Hua University, Hsinchu 30013 (Taiwan)*

\* Corresponding author: [nandan@textile.iitd.ac.in](mailto:nandan@textile.iitd.ac.in), [hlchen@che.nthu.edu.tw](mailto:hlchen@che.nthu.edu.tw)

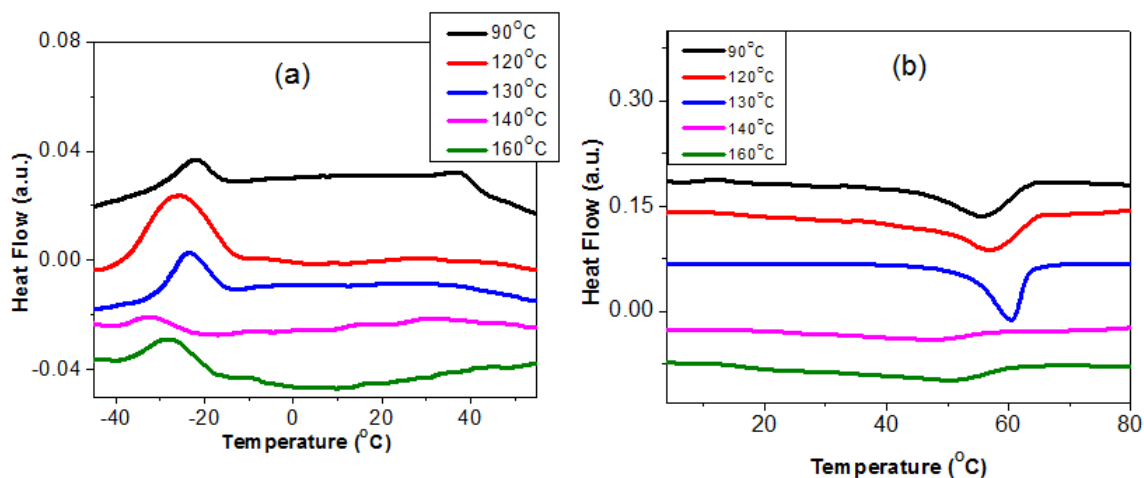

**Figure S1.** DSC cooling (a) and heating (b) curves of S8/E2 electrospun nanofiber blends after thermal treatment of the samples at different melt annealing temperatures ( $T_a$ ).

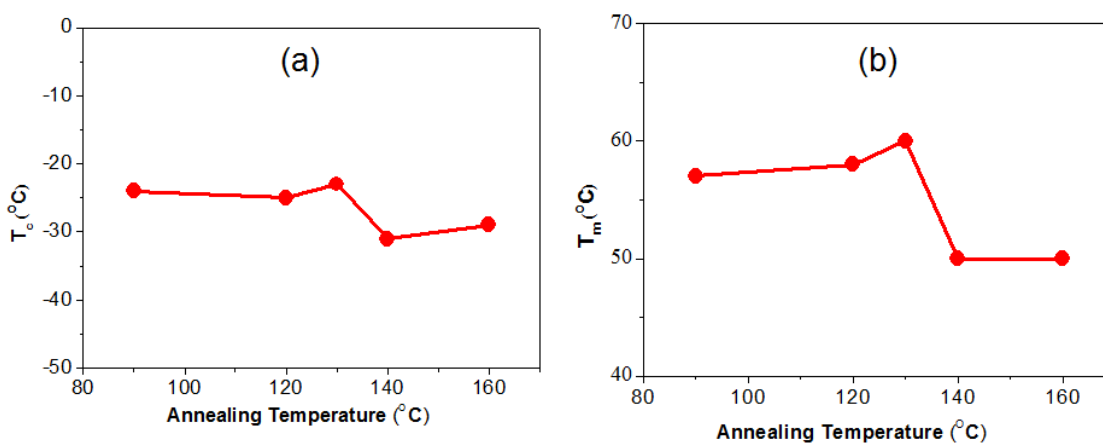

**Figure S2.** Variation of different thermal properties for S8/E2 electrospun nanofiber blends with melt annealing temperature ( $T_a$ ), as ascertained from DSC measurements, (a) melt crystallization temperature ( $T_c$ ); (b) crystalline melting temperature ( $T_m$ ).

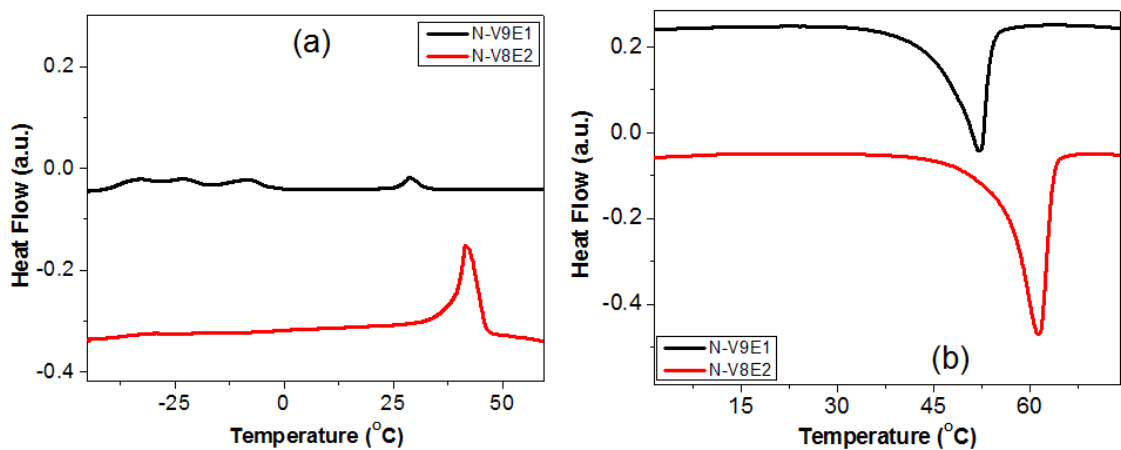

**Figure S3.** DSC cooling (a) and heating (b) curves of P4VP/PEO (90/10) (N-V9E1) and P4VP/PEO (80/20) (N-V8E2) blend nanofibers after first heating upto 90°C.

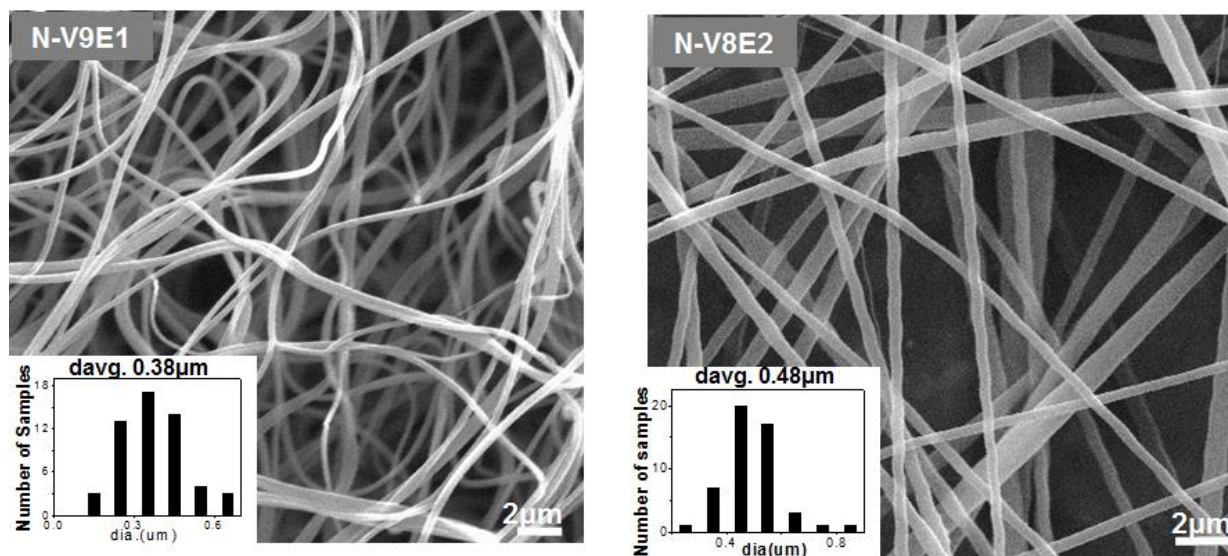

**Figure S4.** SEM micrographs of electrospun P4VP/PEO blend nanofibers (a) N-V9E1; (b); N-V8E2
